# Supplementary material
Source: publisher figshare collection journal article supplement (https://sage.figshare.com/ndownloader/files/14676602)
Supplement: Supplementary file 1 [file 14676602]

**Supplemental Table 1.** Crude incidence rates and adjusted HRs with 95% CIs of clinically manifest AAA in relation to baseline LS7 categories with smoking removed from the summary score, ARIC, 1987-89 through 2011.

| AAA                          | LS7 Categories in 1987-89 |                     |                      | P-trend |
|------------------------------|---------------------------|---------------------|----------------------|---------|
|                              | Poor<br>(0-4)             | Average<br>(5-9)    | Ideal<br>(10-12)     |         |
| N                            | 2,816                     | 10,258              | 1,301                |         |
| Incidence rates <sup>a</sup> | 2.15                      | 1.99                | 0.78                 |         |
| HR <sup>1</sup> (95% CI)     | Ref.                      | 0.82<br>(0.66,1.01) | 0.40<br>(0.25, 0.63) | 0.0002  |
| HR <sup>2</sup> (95% CI)     | Ref.                      | 0.74<br>(0.60,0.92) | 0.39<br>(0.25, 0.62) | <0.0001 |

AAA = abdominal aortic aneurysm; ARIC = Atherosclerosis Risk in Communities; CI = confidence interval; LS7 = Life's Simple 7; HR = hazard ratio; N = number

<sup>a</sup>Crude incidence per 1000 person-years.

<sup>1</sup>Adjusted for race (white, black), sex (female, male), and age (years).

<sup>2</sup>Adjusted for race (white, black), sex (female, male), age (years), and smoking status (poor, intermediate, ideal).

**Supplemental Table 2.** Crude incidence rates and adjusted HRs with 95% CIs of clinically manifest AAA in relation to number of ideal LS7 components at baseline, with smoking removed from the number of ideal components, ARIC, 1987-89 through 2011.

| Number of Ideal LS7 components | Participants at Risk |      | Incidence rate <sup>a</sup> | HR (95% CI) <sup>1</sup> | HR (95% CI) <sup>2</sup> |
|--------------------------------|----------------------|------|-----------------------------|--------------------------|--------------------------|
|                                | N                    | %    |                             |                          |                          |
| 0                              | 1,639                | 11.4 | 2.17                        | Ref.                     | Ref.                     |
| 1                              | 3,544                | 24.7 | 2.38                        | 0.99 (0.74, 1.32)        | 0.93 (0.70,1.24)         |
| 2                              | 3,993                | 27.8 | 2.02                        | 0.83 (0.62,1.10)         | 0.77 (0.57,1.02)         |
| 3                              | 3,017                | 21.0 | 1.59                        | 0.72 (0.52,0.98)         | 0.61 (0.44,0.83)         |
| 4                              | 1,670                | 11.6 | 1.44                        | 0.72 (0.50,1.04)         | 0.63 (0.44,0.92)         |
| 5-6                            | 512                  | 3.56 | 0.54                        | 0.30 (0.13,0.69)         | 0.29 (0.13,0.67)         |

AAA, abdominal aortic aneurysm; ARIC, Atherosclerosis Risk in Communities; CI, confidence interval; HR, hazard ratio; LS7, Life's Simple 7; N, number.

<sup>a</sup>Crude incidence per 1000 person-years.

<sup>1</sup>Adjusted for race (white, black), sex (female, male), and age (years).

<sup>2</sup>Adjusted for race (white, black), sex (female, male), age (years), and smoking status (poor, intermediate, ideal).

**Supplemental Table 3.** Adjusted HRs with 95% CIs of clinically manifest AAA in relation to baseline LS7 components, ARIC, 1987-89 through 2011.

| HR† (95% CI) AAA  | Life's Simple 7 Categories in 1987-89 |                  |                   | P-trend |
|-------------------|---------------------------------------|------------------|-------------------|---------|
|                   | Poor                                  | Intermediate     | Ideal             |         |
| Smoking status    | Ref.                                  | 0.71 (0.49,1.03) | 0.22 (0.18, 0.26) | <0.0001 |
| Blood pressure    | Ref.                                  | 0.82 (0.67,1.01) | 0.65 (0.52,0.81)  | <0.0001 |
| Total cholesterol | Ref.                                  | 0.76 (0.62,0.93) | 0.60 (0.49,0.75)  | <0.0001 |
| Body mass index   | Ref.                                  | 0.99 (0.79,1.22) | 1.00 (0.79,1.26)  | 0.99    |
| Blood glucose     | Ref.                                  | 1.41 (0.98,2.03) | 1.27 (0.89,1.83)  | 0.85    |
| Healthy diet      | Ref.                                  | 0.88 (0.73,1.05) | 0.66 (0.41,1.04)  | 0.045   |
| Physical activity | Ref.                                  | 0.75 (0.59,0.94) | 0.78 (0.64,0.95)  | 0.02    |

AAA = abdominal aortic aneurysm; ARIC = Atherosclerosis Risk in Communities; CI = confidence interval; LS7 = Life's Simple 7; HR = hazard ratio; N = number.

HRs and 95% CI are from separate models for each individual LS7 component adjusted for race (white, black), age (years), and sex (male, female).

**Supplemental Table 4.** Adjusted HRs with 95% CIs of clinically manifest AAA in relation to baseline LS7 components, ARIC, 1987-89 through 2011

| HR† (95% CI) AAA     | Life's Simple 7 Categories in 1987-89 |                  |                   | P-trend |
|----------------------|---------------------------------------|------------------|-------------------|---------|
|                      | Poor                                  | Intermediate     | Ideal             |         |
| Smoking status       | Ref.                                  | 0.66 (0.45,0.96) | 0.20 (0.17,0.25)  | <0.0001 |
| Blood pressure       | Ref.                                  | 0.74 (0.60,0.92) | 0.57 (0.46,0.71)  | <0.0001 |
| Total cholesterol    | Ref.                                  | 0.77 (0.63,0.94) | 0.60 (0.49,0.75)  | <0.0001 |
| Body mass index      | Ref.                                  | 0.94 (0.76,1.17) | 0.86 (0.67,1.10)  | 0.19    |
| Blood glucose        | Ref.                                  | 1.45 (1.01,2.10) | 1.38 (0.95, 2.01) | 0.42    |
| Healthy diet         | Ref.                                  | 0.99 (0.82,1.18) | 0.92 (0.57, 1.46) | 0.79    |
| Physical activity    | Ref.                                  | 0.84 (0.66,1.06) | 0.98 (0.80,1.20)  | 0.97    |
| HR† (95% CI) AAA     |                                       |                  |                   | P-value |
| Age (Per 1 year)     | 1.11 (1.09,1.13)                      | -                | -                 | <0.0001 |
| Sex (Female)         | 0.30 (0.25,0.37)                      | -                | -                 | <0.0001 |
| Race (Black)         | 0.51 (0.39,0.67)                      | -                | -                 | <0.0001 |
| Education            |                                       |                  |                   |         |
| < High school        | Ref.                                  | -                | -                 | -       |
| High school graduate | 0.91 (0.72, 1.15)                     | -                | -                 | 0.46    |
| >High school         | 0.79 (0.62, 1.00)                     | -                | -                 | 0.046   |
| Unknown              | 1.47 (0.20, 10.6)                     | -                | -                 | 0.71    |
| Income               |                                       |                  |                   |         |
| <\$12000             | Ref.                                  | -                | -                 | -       |
| \$12000-24999        | 1.00 (0.71,1.42)                      | -                | -                 | 0.96    |
| \$25000-49999        | 1.38 (0.98,1.94)                      | -                | -                 | 0.07    |
| \$50000+             | 1.29 (0.88,1.88)                      | -                | -                 | 0.18    |
| Unknown              | 1.08 (0.66,1.76)                      | -                | -                 | 0.78    |

AAA = abdominal aortic aneurysm; ARIC = Atherosclerosis Risk in Communities; CI = confidence interval; LS7 = Life's Simple 7; HR = hazard ratio; N = number.

HRs and 95% CIs are from a single multivariable model adjusted for race (white, black), age (years), sex (male, female), baseline educational level (< high school, high school graduate, >high school, and unknown), baseline annual income (<\$12000, \$12000-24999, \$25000-49999, \$50000+, and unknown), and all seven LS7 components.
